# Supplementary material
Source: PubMed Central journal article supplement (PMC10848075)
Supplement: jama-e2326640-s001.pdf [file jama-e2326640-s001.pdf]

## Supplemental Online Content

McCormick N, Yokose C, Challener GJ, Joshi AD, Tanikella S, Choi HK. Serum Urate and Recurrent Gout. *JAMA*. Published online February 6, 2024.  
doi:10.1001/jama.2023.26640

**eMethods.** Assessment of Covariates

**eReferences**

**eTable 1.** Baseline Characteristics of the UK Biobank Participants with and without Linked Primary Care Data Available

**eTable 2.** Diagnostic Codes for Gout in Primary Care Records

**eTable 3.** Rate and Rate Ratio (RR) for Recurrent Gout Flares According to Serum Urate Level and Follow-Up Time from Baseline, Reference <5 mg/dL

**eTable 4.** Rate and Rate Ratio (RR) for Recurrent Gout Flares According to Serum Urate Level from Baseline Over 10 Years' Follow-Up, Reference <6 mg/dL, Generated Using Poisson Regression Models with Robust Variance

**eTable 5.** Rate and Rate Ratios (RR) for Recurrent Gout Flares Requiring Hospitalization, Reference <5 mg/dL

This supplemental material has been provided by the authors to give readers additional information about their work.

## **eMethods**

### **UK Biobank Study Population**

The UK Biobank (UKB) resource is a prospective cohort of more than 500,000 residents of the United Kingdom (UK) aged 40 to 69 years at the time of enrollment (years 2006 to 2010) when participants provided blood samples and attended a baseline visit where data on baseline characteristics were obtained through a touchscreen questionnaire, in-person interview, and measurements.

### **Assessment of Race in UKB**

Ethnic group was self-reported by participants when completing the touchscreen questionnaire, who were asked to select from one of the following categories: Asian, Black, White, Mixed (e.g., White and Black African, White and Asian), and Other. Although the term ‘ethnic group’ is used in place of ‘race’ in the UK,<sup>1</sup> ‘race’ is used to avoid confusion with the distinct US categories of Hispanic and non-Hispanic ethnicity.

### **Assessment of Covariates in UKB**

At the baseline visit, information was obtained through a touchscreen questionnaire and in-person interview on sociodemographics, diet and lifestyle factors, and medical conditions and medications taken on a regular basis (including diuretics and urate-lowering therapy); anthropometrics, including height and weight, were also obtained by assessment center staff using calibrated instruments.<sup>2</sup> Body mass index was computed by dividing the weight in kilograms by the square of the height in meters. Coffee consumption was computed from responses on the number of cups consumed per day, and categorised as 0, 1-2, 3-5, or > 5. Alcoholic beverage consumption was computed from responses to questions on the frequency of alcoholic beverage consumption, with six categories ranging from Never to Special Occasions Only, 1-3 Times per Month, Once or Twice per Week, Three or Four Times per Week, and Daily. Red meat, fish, and poultry intake were computed from responses to questions on weekly consumption of beef, lamb, pork, processed meats, poultry, and oily and non-oily fish, ranging from Never to  $\geq 1$  serving per day. Smoking status was categorised as Current, Former, or Never. Cardiovascular disease and type 2 diabetes status were based upon self-reported diagnoses at baseline. Prevalent hypertension was defined according to self-reported diagnosis at baseline, or primary care or hospitalisation diagnosis recorded before baseline. As with urate, creatinine was measured from each participant’s baseline blood sample using an enzymatic assay on a Beckman Coulter AU5800 platform.<sup>3</sup> Serum creatinine levels were used to determine glomerular filtration rate (eGFR)<sup>4</sup> and chronic kidney disease (CKD) status, defined as eGFR <60 mL/min.

### **eReferences.**

1. Statistics OfN. Final recommended questions for the 2011 Census in England and Wales: Ethnic group. <http://www.ons.gov.uk/ons/guide-method/census/2011/the-2011-census/2011-census-questionnaire-content/final-recommended-questions-2011---ethnic-group.pdf>
2. Caleyachetty R, Littlejohns T, Lacey B, et al. United Kingdom Biobank (UK Biobank): JACC Focus Seminar 6/8. *J Am Coll Cardiol*. Jul 6 2021;78(1):56-65. doi:10.1016/j.jacc.2021.03.342

3. Biobank U. Companion document to accompany serum biomarker data.  
[https://biobank.ctsu.ox.ac.uk/crystal/ukb/docs/serum\\_biochemistry.pdf](https://biobank.ctsu.ox.ac.uk/crystal/ukb/docs/serum_biochemistry.pdf)
4. Inker LA, Eneanya ND, Coresh J, et al. New Creatinine- and Cystatin C-Based Equations to Estimate GFR without Race. *N Engl J Med*. Nov 4 2021;385(19):1737-1749.  
doi:10.1056/NEJMoa2102953

**eTable 1: Baseline Characteristics of the UK Biobank Participants with and without Linked Primary Care Data Available**

|                                               | <b>Primary Care Data Available</b> | <b>Primary Care Data Not Available</b> |
|-----------------------------------------------|------------------------------------|----------------------------------------|
| N                                             | 228,939                            | 273,551                                |
| Females, N (%)                                | 125,258 (54.7%)                    | 148,117 (54.1%)                        |
| Males, N (%)                                  | 103,681 (45.3%)                    | 125,433 (45.9%)                        |
| Age, mean (SD)                                | 56.5 (8.07)                        | 56.5 (8.12)                            |
| Race, N (%)                                   |                                    |                                        |
| Asian                                         | 5292 (2.3%)                        | 6164 (2.3%)                            |
| Black                                         | 2502 (1.1%)                        | 5559 (2.0%)                            |
| White                                         | 217,217 (94.9%)                    | 255,463 (93.4%)                        |
| Multiple*                                     | 1169 (0.5%)                        | 1789 (0.7%)                            |
| Other**                                       | 1680 (0.7%)                        | 2878 (1.1%)                            |
| Serum urate (mg/dL), mean (SD)                | 5.19 (1.35)                        | 5.20 (1.35)                            |
| BMI, mean (SD)                                | 27.5 (4.82)                        | 27.4 (4.79)                            |
| Alcohol consumption                           |                                    |                                        |
| Daily, N (%)                                  | 44,975 (19.6%)                     | 56,793 (20.8%)                         |
| Never, N (%)                                  | 18,782 (8.2%)                      | 21,857 (8.0%)                          |
| Smoking status, N (%)                         |                                    |                                        |
| Never                                         | 125,419 (54.8%)                    | 148,987 (54.5%)                        |
| Former                                        | 78,609 (34.3%)                     | 94,441 (34.5%)                         |
| Current                                       | 24,011 (10.5%)                     | 28,966 (10.6%)                         |
| Coffee intake, cups/day, N (%)                |                                    |                                        |
| 0                                             | 50,828 (22.2%)                     | 60,377 (22.1%)                         |
| 1-2                                           | 87,417 (38.2%)                     | 106,718 (39.0%)                        |
| 3-5                                           | 58,795 (25.7%)                     | 69,075 (25.3%)                         |
| >5                                            | 14,508 (6.3%)                      | 16,193 (5.9%)                          |
| Red meat intake (servings/week) mean (SD)     | 3.52 (2.39)                        | 3.53 (2.41)                            |
| Poultry intake (servings/week) mean (SD)      | 1.91 (1.31)                        | 1.92 (1.33)                            |
| Fish intake (servings/week) mean (SD)         | 2.24 (1.69)                        | 2.23 (1.72)                            |
| Diuretic use, N (%)                           | 16,305 (7.1%)                      | 18,829 (6.9%)                          |
| Urate lowering therapy use, N (%)             | 2646 (1.2%)                        | 3024 (1.1%)                            |
| Hypertension, N (%)                           | 28,779 (12.6%)                     | 22,830 (8.3%)                          |
| Cardiovascular disease, N (%)                 | 11,715 (5.1%)                      | 13,106 (4.8%)                          |
| Diabetes, N (%)                               | 11,942 (5.2%)                      | 14,457 (5.3%)                          |
| Chronic kidney disease stage $\geq 3$ , N (%) | 3420 (1.5%)                        | 3934 (1.4%)                            |

Serum urate levels were measured from blood samples taken at the baseline assessment, at the same time that data were collected on height and weight and self-reported dietary intake, lifestyle factors, and current medication use. N, number; SD, standard deviation.

\*Self-selected by participants, with further response options including ‘White and Black Caribbean’, ‘White and Black African’, ‘White and Asian’, and ‘Any other mixed background’; \*\*Self-selected by participants, no further response options available. \*\*\*Glomerular filtration rate < 60 mL/min.

**eTable 2. Diagnostic Codes for Gout Encounters and Procedures in Primary Care Medical Records**

| <b>Diagnoses of Gout Flare</b> |                                         |
|--------------------------------|-----------------------------------------|
| <b>Read Code</b>               | <b>Term</b>                             |
| N023300                        | Gouty arthritis of the forearm          |
| N023z00                        | Gouty arthritis NOS                     |
| N023200                        | Gouty arthritis of the upper arm        |
| N023.00                        | Gouty arthritis                         |
| N023800                        | Gouty arthritis of toe                  |
| N023y00                        | Gouty arthritis of other specified site |
| N023400                        | Gouty arthritis of the hand             |
| N023x00                        | Gouty arthritis of multiple sites       |
| C346.00                        | Acute exacerbation of gout              |
| N023700                        | Gouty arthritis of the ankle and foot   |
| N023600                        | Gouty arthritis of the lower leg        |
| N023100                        | Gouty arthritis of the shoulder region  |
| N023000                        | Gouty arthritis of unspecified site     |
| <b>ICD-10 Code</b>             | <b>Term</b>                             |
| M10                            | Gout                                    |

| <b>Diagnoses of Gout</b> |                                          |
|--------------------------|------------------------------------------|
| <b>Read Code</b>         | <b>Term</b>                              |
| 34..00                   | Gout                                     |
| N023.00                  | Gouty arthritis                          |
| 1443                     | H/O: gout                                |
| C34y200                  | Gouty tophi of other sites               |
| C34y500                  | Gouty tophi of hand                      |
| C340.00                  | Gouty arthropathy                        |
| C342.00                  | Idiopathic gout                          |
| N023z00                  | Gouty arthritis NOS                      |
| 6691                     | Initial gout assessment                  |
| 669..00                  | Gout monitoring                          |
| 2D52.00                  | O/E - auricle of ear - tophi             |
| C345.00                  | Gout due to impairment of renal function |
| C34z.00                  | Gout NOS                                 |
| C34yz00                  | Other specified gouty manifestation NOS  |
| C34y.00                  | Other specified gouty manifestation      |
| 6693                     | Joints gout affected                     |
| 6695                     | Date gout treatment started              |
| 6699                     | Gout treatment changed                   |
| 6692                     | Follow-up gout assessment                |

### Diagnoses of Gout (continued)

|         |                                         |
|---------|-----------------------------------------|
| N023700 | Gouty arthritis of the ankle and foot   |
| C34y000 | Gouty tophi of ear                      |
| 669A.00 | Date gout treatment stopped             |
| C344.00 | Drug-induced gout                       |
| N023300 | Gouty arthritis of the forearm          |
| N023600 | Gouty arthritis of the lower leg        |
| C34y300 | Gouty iritis                            |
| N023400 | Gouty arthritis of the hand             |
| 6698    | Gout drug side effects                  |
| 669Z.00 | Gout monitoring NOS                     |
| C341.00 | Gouty nephropathy                       |
| G557300 | Gouty tophi of heart                    |
| N023x00 | Gouty arthritis of multiple sites       |
| 6697    | Gout associated problems                |
| C34y400 | Gouty neuritis                          |
| N023y00 | Gouty arthritis of other specified site |
| C341z00 | Gouty nephropathy NOS                   |
| 6696    | Date of last gout attack                |
| N023100 | Gouty arthritis of the shoulder region  |
| N023800 | Gouty arthritis of toe                  |
| C34y100 | Gouty tophi of heart                    |
| Nyu1700 | [X]Other secondary gout                 |
| N023200 | Gouty arthritis of the upper arm        |
| C346.   | 00 Acute exacerbation of gout           |
| C343.   | 00 Lead-induced gout                    |
| N0230   | 00 Gouty arthritis of unspecified site  |
| C3410   | 00 Gout nephropathy unspecified         |

### Gout-Related Procedures

| Read Code | Term                                |
|-----------|-------------------------------------|
| 7K6U4     | Aspiration of joint NEC             |
| 7K6Z0     | Aspiration of joint                 |
| 7K6Z8     | Aspiration of fluid from knee joint |
| XM13x     | Joint -diag.aspiration              |
| XM16K     | Therapeutic aspiration - joint      |
| Xa1t3     | Aspiration of elbow joint           |
| Xa1t5     | Aspiration of knee joint            |
| Xa84w     | Aspiration of joint                 |
| 4B...     | Synovial fluid examination          |

**Gout-Related Procedures (continued)**

|       |                                          |
|-------|------------------------------------------|
| XE26K | Joint fluid sample                       |
| X76zq | Synovial fluid observation               |
| X76zs | Synovial fluid composition               |
| X76zt | Stringing of synovial fluid              |
| XC0T3 | Synovial fluid cells                     |
| XC0T4 | Synovial fluid inclusion                 |
| XC0tz | Particulate matter in synovial fluid     |
| XE26L | Synovial fluid: bloodstained             |
| XE276 | Synovial fluid for organism              |
| XE29u | Synovial fluid source                    |
| XM1Wl | Synovial fluid - C/S                     |
| XaXOZ | Synovial fluid mucin clot test           |
| XaXkc | Synovial fluid sample sent to laboratory |
| 569H. | Magnetic resonance imaging of shoulder   |
| 569L. | Magnetic resonance imaging of knee       |
| 569Q. | Magnetic resonance imaging of femur      |
| 569R. | MRI of upper limb                        |
| 569S. | MRI of lower limb                        |
| 7P0A9 | MRI of ankle                             |
| X70oy | MRI of upper limb                        |
| X70oz | MRI of shoulder                          |
| X70p0 | MRI of upper arm                         |
| X70p1 | MRI of elbow                             |
| X70p2 | MRI of forearm                           |
| X70p3 | MRI of wrist                             |
| X70p4 | MRI of hand                              |
| X70p5 | MRI of lower limb                        |
| X70p6 | MRI of hip                               |
| X70p7 | MRI of thigh                             |
| X70p8 | MRI of knee                              |
| X70p9 | MRI of lower leg                         |
| X70pA | MRI of ankle                             |
| X70pB | MRI of foot                              |
| XaMdR | MRI of femur                             |
| 5287. | Elbow X-ray                              |
| 5289. | Wrist X-ray                              |
| 529.. | Hand X-ray                               |
| 52A7. | Plain X-ray knee                         |

**Gout-Related Procedures (continued)**

|       |                           |
|-------|---------------------------|
| 52A8. | Patella X-ray             |
| 52AA. | Ankle X-ray               |
| 52AB. | Stress X-ray knee         |
| 52AC. | Stress X-ray ankle joint  |
| 52B.. | Foot X-ray                |
| X70eB | Wrist X-ray skyline views |
| X70eC | Metacarpal X-ray          |
| X70eE | Fingers X-ray             |
| X70eF | Thumb X-ray               |
| X70eK | Metatarsal X-ray          |
| X70eL | Plain X-ray tarsus        |
| X70eM | Hindfoot X-ray            |
| X70eN | Hallux X-ray              |
| X70eO | Toe X-ray                 |
| XE1RF | Scaphoid X-ray            |
| XE2rY | Carpal bones X-ray        |
| XM1ZI | Forefoot X-ray            |



**eTable 3. Rate and Rate Ratio (RR) for Recurrent Gout Flares According to Serum Urate Level and Follow-Up Time from Baseline, Reference <5 mg/dL**

|                | No of Gout Patients | Follow-up, Person years (PY) | No of Flares | Flares per 1000 PY | Unadjusted RR (95% CI)  | Adjusted* RR (95% CI)   | Extended Adjusted** RR (95% CI) |
|----------------|---------------------|------------------------------|--------------|--------------------|-------------------------|-------------------------|---------------------------------|
| <b>1 Year</b>  |                     |                              |              |                    |                         |                         |                                 |
| <5 mg/dL       | 522                 | 522                          | 4            | 7.7                | 1.0 (ref)               | 1.0 (ref)               | 1.0 (ref)                       |
| 5 to 6 mg      | 535                 | 535                          | 6            | 11.2               | 1.46 (0.41 to 5.25)     | 1.35 (0.38 to 4.84)     | 1.31 (0.36 to 4.72)             |
| 6 to 7         | 781                 | 780                          | 43           | 55.2               | 7.19 (2.55 to 20.29)    | 6.09 (2.15 to 17.30)    | 5.47 (1.90 to 15.81)            |
| 7 to 8         | 872                 | 870                          | 109          | 125.3              | 16.33 (5.95 to 44.86)   | 13.72 (4.96 to 37.96)   | 11.44 (4.02 to 32.53)           |
| 8 to 9         | 609                 | 609                          | 77           | 126.4              | 16.49 (5.95 to 45.70)   | 14.04 (5.03 to 39.20)   | 11.50 (3.99 to 33.10)           |
| 9 to 10        | 212                 | 212                          | 41           | 193.8              | 25.26 (8.82 to 72.36)   | 22.44 (7.79 to 64.66)   | 19.67 (6.59 to 58.74)           |
| ≥10 mg/dL      | 82                  | 82                           | 25           | 306.7              | 40.29 (13.30 to 122.01) | 34.57 (11.37 to 105.14) | 31.69 (9.96 to 100.80)          |
| Per mg/dL      | 3613                | 3608                         | 305          | 84.5               | 1.67 (1.54 to 1.82)     | 1.66 (1.52 to 1.80)     | 1.63 (1.48 to 1.80)             |
| Per SD         | 3613                | 3608                         | 305          | 84.5               | 2.31 (2.01 to 2.65)     | 2.27 (1.98 to 2.62)     | 2.22 (1.89 to 2.61)             |
| <b>2 Years</b> |                     |                              |              |                    |                         |                         |                                 |
| <5 mg/dL       | 522                 | 1043                         | 10           | 9.6                | 1.0 (ref)               | 1.0 (ref)               | 1.0 (ref)                       |
| 5 to 6         | 535                 | 1068                         | 12           | 11.2               | 1.17 (0.50 to 2.75)     | 1.09 (0.46 to 2.56)     | 1.08 (0.46 to 2.55)             |
| 6 to 7         | 781                 | 1554                         | 79           | 50.8               | 5.30 (2.71 to 10.37)    | 4.60 (2.33 to 9.05)     | 4.26 (2.13 to 8.52)             |
| 7 to 8         | 872                 | 1735                         | 184          | 106.0              | 11.05 (5.77 to 21.18)   | 9.56 (4.96 to 18.44)    | 8.43 (4.27 to 16.66)            |
| 8 to 9         | 609                 | 1217                         | 155          | 127.3              | 13.27 (6.89 to 25.58)   | 11.62 (5.99 to 22.52)   | 10.13 (5.08 to 20.17)           |
| 9 to 10        | 212                 | 421                          | 81           | 192.3              | 20.02 (10.08 to 39.77)  | 18.21 (9.13 to 36.35)   | 16.43 (7.98 to 33.83)           |
| ≥10 mg/dL      | 82                  | 162                          | 44           | 272.4              | 28.63 (13.59 to 60.29)  | 25.19 (11.91 to 53.28)  | 24.18 (11.02 to 53.07)          |
| Per mg/dL      | 3613                | 7200                         | 565          | 78.5               | 1.68 (1.58 to 1.80)     | 1.67 (1.57 to 1.79)     | 1.65 (1.53 to 1.78)             |
| Per SD         | 3613                | 7200                         | 565          | 78.5               | 2.34 (2.10 to 2.60)     | 2.31 (2.08 to 2.57)     | 2.26 (2.00 to 2.55)             |

|                 | No of Gout Patients | Follow-up, Person years (PY) | No of Flares | Flares per 1000 PY | Unadjusted RR (95% CI) | Adjusted* RR (95% CI) | Extended Adjusted** RR (95% CI) |
|-----------------|---------------------|------------------------------|--------------|--------------------|------------------------|-----------------------|---------------------------------|
| <b>5 Years</b>  |                     |                              |              |                    |                        |                       |                                 |
| <5 mg/dL        | 522                 | 2583                         | 27           | 10.5               | 1.0 (ref)              | 1.0 (ref)             | 1.0 (ref)                       |
| 5 to 6          | 535                 | 2647                         | 31           | 11.7               | 1.12 (0.66 to 1.92)    | 1.03 (0.60 to 1.77)   | 1.03 (0.60 to 1.77)             |
| 6 to 7          | 781                 | 3845                         | 170          | 44.2               | 4.22 (2.75 to 6.48)    | 3.64 (2.36 to 5.61)   | 3.34 (2.14 to 5.21)             |
| 7 to 8          | 872                 | 4299                         | 407          | 94.7               | 9.05 (6.00 to 13.66)   | 7.80 (5.14 to 11.84)  | 6.85 (4.43 to 10.59)            |
| 8 to 9          | 609                 | 3023                         | 369          | 122.0              | 11.71 (7.72 to 17.74)  | 10.18 (6.68 to 15.52) | 8.85 (5.69 to 13.77)            |
| 9 to 10         | 212                 | 1041                         | 172          | 165.2              | 15.79 (10.07 to 24.77) | 14.10 (8.95 to 22.21) | 12.48 (7.74 to 20.12)           |
| ≥10 mg/dL       | 82                  | 397                          | 76           | 191.4              | 18.48 (10.95 to 31.19) | 16.06 (9.48 to 27.20) | 15.32 (8.81 to 26.63)           |
| Per mg/dL       | 3613                | 17,836                       | 1252         | 70.2               | 1.69 (1.61 to 1.78)    | 1.67 (1.59 to 1.76)   | 1.63 (1.54 to 1.73)             |
| Per SD          | 3613                | 17,836                       | 1252         | 70.2               | 2.35 (2.17 to 2.55)    | 2.30 (2.12 to 2.50)   | 2.23 (2.03 to 2.44)             |
| <b>10 Years</b> |                     |                              |              |                    |                        |                       |                                 |
| <5 mg/dL        | 522                 | 4374                         | 42           | 9.6                | 1.0 (ref)              | 1.0 (ref)             | 1.0 (ref)                       |
| 5 to 6          | 535                 | 4459                         | 52           | 11.7               | 1.21 (0.79 to 1.86)    | 1.12 (0.73 to 1.72)   | 1.12 (0.73 to 1.73)             |
| 6 to 7          | 781                 | 6458                         | 259          | 40.1               | 4.16 (2.93 to 5.90)    | 3.59 (2.52 to 5.12)   | 3.37 (2.34 to 4.85)             |
| 7 to 8          | 872                 | 7260                         | 595          | 82.0               | 8.52 (6.09 to 11.93)   | 7.37 (5.23 to 10.38)  | 6.62 (4.62 to 9.48)             |
| 8 to 9          | 609                 | 5106                         | 517          | 101.3              | 10.59 (7.53 to 14.91)  | 9.22 (6.51 to 13.05)  | 8.30 (5.75 to 11.97)            |
| 9 to 10         | 212                 | 1756                         | 220          | 125.3              | 12.94 (8.87 to 18.89)  | 11.50 (7.84 to 16.85) | 10.47 (6.99 to 15.67)           |
| ≥10 mg/dL       | 82                  | 663                          | 88           | 132.8              | 14.02 (8.90 to 22.11)  | 12.15 (7.67 to 19.22) | 12.04 (7.44 to 19.48)           |
| Per mg/dL       | 3613                | 30,076                       | 1773         | 59.0               | 1.64 (1.57 to 1.71)    | 1.61 (1.54 to 1.68)   | 1.58 (1.50 to 1.66)             |
| Per SD          | 3613                | 30,076                       | 1773         | 59.0               | 2.23 (2.08 to 2.40)    | 2.18 (2.02 to 2.34)   | 2.11 (1.95 to 2.28)             |

No, number; PY, person years; SD, standard deviation; 95% CI, 95% confidence interval.

\* Adjusted for age, sex, and race

\*\*Adjusted for variables included in the primary model (age, sex, and race) plus body mass index (continuous), smoking status, alcohol intake, coffee intake, red meat, fish, and poultry intake, diuretic and urate-lowering therapy use, and prevalent diabetes, cardiovascular disease, hypertension, and chronic kidney disease.

**eTable 4. Rate and Rate Ratio (RR) for Recurrent Gout Flares According to Serum Urate Level from Baseline Over 10 Years' Follow-Up, Reference <6 mg/dL, Generated Using Poisson Regression Models with Robust Variance**

|           | No of Gout Patients | Follow-up, Person years (PY) | No of Flares | Flares per 1000 PY | Unadjusted RR (95% CI) | Adjusted* RR (95% CI) | Extended Adjusted** RR (95% CI) |
|-----------|---------------------|------------------------------|--------------|--------------------|------------------------|-----------------------|---------------------------------|
| <6 mg/dL  | 1057                | 8833                         | 94           | 10.6               | 1.0 (ref)              | 1.0 (ref)             | 1.0 (ref)                       |
| 6 to 7    | 781                 | 6458                         | 259          | 40.1               | 3.77 (2.81 to 5.05)    | 3.41 (2.53 to 4.58)   | 3.18 (2.34 to 4.31)             |
| 7 to 8    | 872                 | 7260                         | 595          | 82.0               | 7.70 (5.90 to 10.05)   | 6.93 (5.27 to 9.10)   | 6.17 (4.63 to 8.22)             |
| 8 to 9    | 609                 | 5106                         | 517          | 101.3              | 9.51 (7.27 to 12.46)   | 8.59 (6.53 to 11.30)  | 7.63 (5.70 to 10.22)            |
| 9 to 10   | 212                 | 1756                         | 220          | 125.3              | 11.77 (8.81 to 15.73)  | 10.93 (8.17 to 14.62) | 9.74 (7.15 to 13.28)            |
| ≥10 mg/dL | 82                  | 663                          | 88           | 132.8              | 12.47 (8.17 to 19.06)  | 11.40 (7.47 to 17.39) | 10.91 (7.02 to 16.96)           |
| Per mg/dL | 3613                | 30,076                       | 1773         | 59.0               | 1.50 (1.44 to 1.56)    | 1.49 (1.43 to 1.55)   | 1.48 (1.41 to 1.55)             |
| Per SD    | 3613                | 30,076                       | 1773         | 59.0               | 1.94 (1.81 to 2.07)    | 1.91 (1.79 to 2.04)   | 1.90 (1.76 to 2.05)             |

No, number; PY, person years; SD, standard deviation; 95% CI, 95% confidence interval.

\* Adjusted for age, sex, and race

\*\*Adjusted for variables included in the primary model (age, sex, and race) plus body mass index (continuous), smoking status, alcohol intake, coffee intake, red meat, fish, and poultry intake, diuretic and urate-lowering therapy use, and prevalent diabetes, cardiovascular disease, hypertension, and chronic kidney disease.

**eTable 5. Rate and Rate Ratios (RR) for Recurrent Gout Flares Requiring Hospitalization**

|           | No of Gout Patients | Follow-up, Person years (PY) | No of Flares | Flares per 1000 PY | Unadjusted RR (95% CI) | Adjusted* RR (95% CI) |
|-----------|---------------------|------------------------------|--------------|--------------------|------------------------|-----------------------|
| <5 mg/dL  | 522                 | 5537                         | 0            | 0                  | -                      | -                     |
| 5 to 6    | 535                 | 5661                         | 2            | 0.35               | -                      | -                     |
| 6 to 7    | 781                 | 8214                         | 8            | 0.97               | -                      | -                     |
| 7 to 8    | 872                 | 9226                         | 17           | 1.8                | -                      | -                     |
| 8 to 9    | 609                 | 6450                         | 14           | 2.2                | -                      | -                     |
| 9 to 10   | 212                 | 2229                         | 15           | 6.7                | -                      | -                     |
| ≥10 mg/dL | 82                  | 825                          | 8            | 9.7                | -                      | -                     |
| Per mg/dL | 3613                | 38,142                       | 64           | 1.7                | 1.89 (1.59 to 2.25)    | 1.87 (1.57 to 2.23)   |
| Per SD    | 3613                | 38,142                       | 64           | 1.7                | 2.83 (2.14 to 3.75)    | 2.77 (2.08 to 3.69)   |

Rate ratios not reported by serum urate category since no events occurred in the reference category (i.e., <5 mg/dL).

No, number; PY, person years; SD, standard deviation; 95% CI, 95% confidence interval.

\* Adjusted for age, sex, and race
