# Supplementary material
Source: PubMed Central journal article supplement (PMC10848075)
Supplement: jama-e2326640-s002.pdf [file jama-e2326640-s002.pdf]

## Data Sharing Statement

### Data

**Data available:** No

### Additional Information

**Explanation for why data not available:** UK Biobank data cannot be released publicly by individual researchers. However, investigators can apply to access the data through <https://www.ukbiobank.ac.uk/>
